# Supplementary material for: Genetic risk for autoimmunity is associated with distinct changes in the human gut microbiome
Source: PubMed Central journal article supplement (PMC6689114; doi:10.1038/s41467-019-11460-x), 2019-08-09
Supplement: 41467_2019_11460_MOESM1_ESM.pdf [file 41467_2019_11460_MOESM1_ESM.pdf]

## Supplemental Information

Genetic risk for autoimmunity is associated with distinct changes in the human gut microbiome

Russell et al.

| Genotype  | Number of subjects | T1D Mother | T1D Father | T1D Siblings | T1D Grandparent | Antibiotics (>11 months) | Breastfed (>11 months) |    |
|-----------|--------------------|------------|------------|--------------|-----------------|--------------------------|------------------------|----|
| High      | 30                 |            |            |              |                 |                          |                        |    |
| DR3/4     | 30                 | -          | -          | -            | 3               | 18;12                    | 2                      | 1  |
| Increased | 99                 |            |            |              |                 |                          |                        |    |
| DR3/Z     | 43                 | -          | -          | -            | 2               | 24;19                    | 2                      | 2  |
| DR4/Z     | 56                 | -          | 1          | -            | 6               | 27;29                    | 4                      | 6  |
| Neutral   | 134                | -          | -          | -            | -               |                          |                        |    |
| DR3/X     | 45                 | -          | 1          | 1            | 1               | 22;23                    | 3                      | 7  |
| DR4/X     | 47                 | -          | -          | -            | 2               | 27;20                    | 5                      | 6  |
| DRZ/Z     | 42                 | -          | 1          | -            | 4               | 20;22                    | 3                      | 4  |
| Decreased | 140                |            |            |              |                 |                          |                        |    |
| DRX/X     | 140                | 3          | 3          | 1            | 6               | 73;67                    | 11                     | 17 |
| Total     | 403                | 3          | 6          | 2            | 24              | 403                      | 30                     | 43 |

X = protective haplotype

Z = non-risk and non-protective haplotype

### Supplementary Table 1 – Dataset characteristics

Dataset characteristics including number of participants per genetic risk group category, their genotype, sex, number of participants with T1D afflicted family members included in the analysis, number of participants who took antibiotics 1 month prior to sample collection and the number of participants still breastfed within 1 month of sample collection.
